# Supplementary material for: The Effect of Mobile Care Delivery on Clinically Meaningful Outcomes, Satisfaction, and Engagement Among Physical Therapy Patients: Observational Retrospective Study
Source: PubMed Central journal article supplement (PMC8851343; doi:10.2196/31349), 2022-02-02
Supplement: rehab_v9i1e31349_app2.pdf [file rehab_v9i1e31349_app2.pdf]

## Main Effects Only

| Variable                           | OR (95% CI)            | P value |
|------------------------------------|------------------------|---------|
| <b>Pain MCID</b>                   |                        |         |
| Intercept                          | 1.47 (1.15 to 1.87)    | .002    |
| Number of Workouts Per Week        | 1.13 (1.04 to 1.21)    | .002    |
| <b>Function MCID</b>               |                        |         |
| Intercept                          | 1.32 (0.99 to 1.78)    | .06     |
| Number of Weeks in Program         | 1.03 (1.00 to 1.06)    | .03     |
| <b>Promoter MCID</b>               |                        |         |
| Follow-ups Only                    |                        |         |
| Intercept                          | 2.87 (2.14 to 3.85)    | <.001   |
| 1-2 Follow-up Visits               | 2.01 (1.32 to 3.08)    | <.001   |
| 3-4 Follow-up Visits               | 2.16 (1.29 to 3.62)    | .003    |
| 5+ Follow-up Visits                | 3.49 (1.52 to 8.01)    | .003    |
| Function MCID Only                 |                        |         |
| Intercept                          | 3.68 (2.79 to 4.86)    | <.001   |
| Function MCID                      | 1.56 (1.08 to 2.25)    | .02     |
| Large Pain Change Only             |                        |         |
| Intercept                          | 3.86 (3.12 to 4.77)    | <.001   |
| Large Pain MCID                    | 2.08 (1.36 to 3.18)    | <.001   |
| <b>Number of Workouts Per Week</b> |                        |         |
| Follow-ups Only                    |                        |         |
| Intercept                          | 2.32 (2.13 to 2.52)    | <.001   |
| 1-2 Follow-up Visits               | 1.22 (1.1 to 1.36)     | <.001   |
| 3-4 Follow-up Visits               | 1.44 (1.28 to 1.61)    | <.001   |
| 5+ Follow-up Visits                | 1.16 (0.99 to 1.36)    | .07     |
| Days Messaged by PT per Week Only  |                        |         |
| Intercept                          | 2.2 (2.02 to 2.39)     | <.001   |
| Days Messaged by PT per Week       | 1.13 (1.09 to 1.18)    | <.001   |
| Access Only                        |                        |         |
| Intercept                          | 2.54 (2.38 to 2.7)     | <.001   |
| 24-hours to first visit            | 1.18 (1.09 to 1.29)    | <.001   |
| <b>Number of Weeks in Program</b>  |                        |         |
| Follow-ups Only                    |                        |         |
| Intercept                          | 8.00 (7.64 to 8.37)    | <.001   |
| 1-2 Follow-up Visits               | 1.02 (0.96 to 1.08)    | .54     |
| 3-4 Follow-up Visits               | 1.21 (1.13 to 1.29)    | <.001   |
| 5+ Follow-up Visits                | 1.87 (1.74 to 2.01)    | <.001   |
| Days Messaged by PT per Week Only  |                        |         |
| Intercept                          | 11.55 (11.06 to 12.07) | <.001   |
| Days Messaged by PT per Week       | 0.87 (0.85 to 0.89)    | <.001   |
